# Supplementary material for: LNX1 Contributes to Cell Cycle Progression and Cisplatin Resistance
Source: MDPI journal article supplement (doi:10.3390/cancers13164066), 2021-08-12
Supplement: s1 [file s1]

# Supplementary Materials: *LNK1* Contributes to Cell Cycle Progression and Cisplatin Resistance

Minsu Jang, Rackhyun Park, Yea-In Park, Yeonjeong Park, Jin I. Lee, Sim Namkoong, Eun-Ju Lee and Junsoo Park

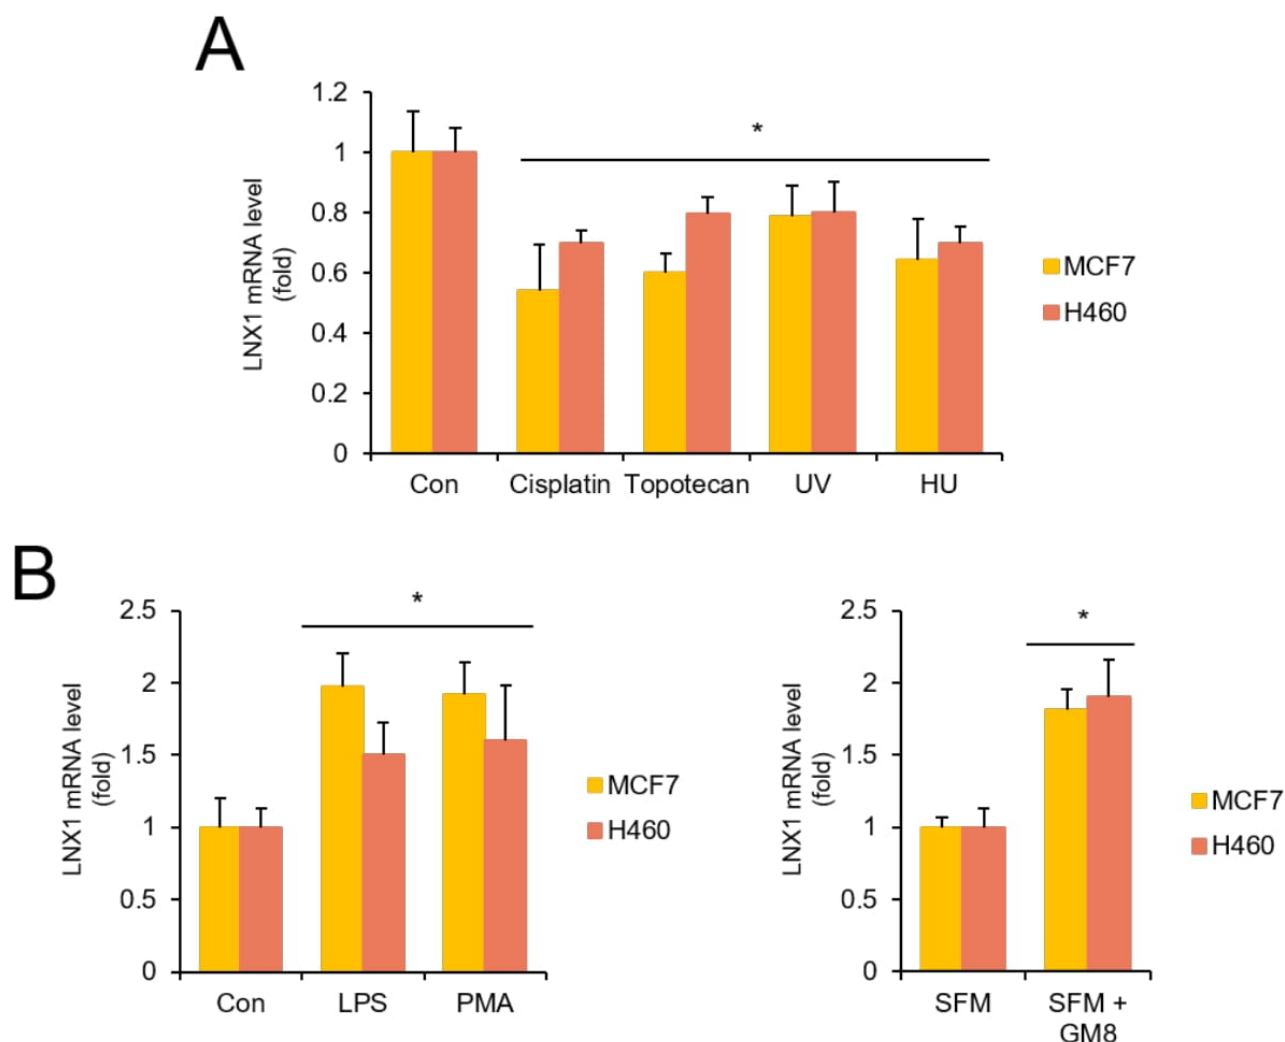

**Figure S1.** DNA damage and cell growth were associated with expression of *LNK1* in MCF7 and H460 cells. (A) Each cell was treated with cisplatin (10  $\mu\text{g/mL}$ ), topotecan (0.1  $\mu\text{M}$ ) and Hydroxyurea (1  $\mu\text{M}$ ) or irradiated with UV (50  $\text{mJ/cm}^2$ ). (B) Each cell was treated with LPS (100  $\text{ng/mL}$ ), PMA (200  $\text{nM}$ ) or incubated with serum-free medium for 24 h. serum-free medium was replaced to growth media and cells were incubated for 8 h. Expression levels were calculated by quantitative real-time PCR analysis. The results are represented as relative mRNA levels. Control vs. Drug-treated cells, \*:  $p < 0.05$ .

A

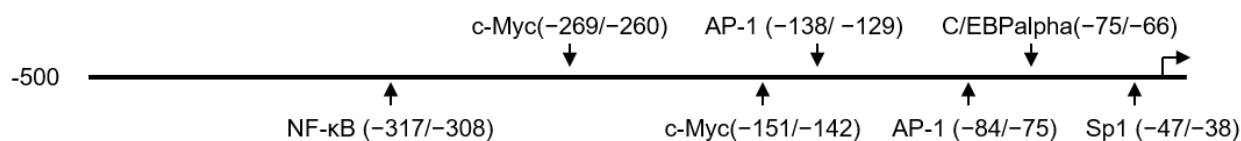

B

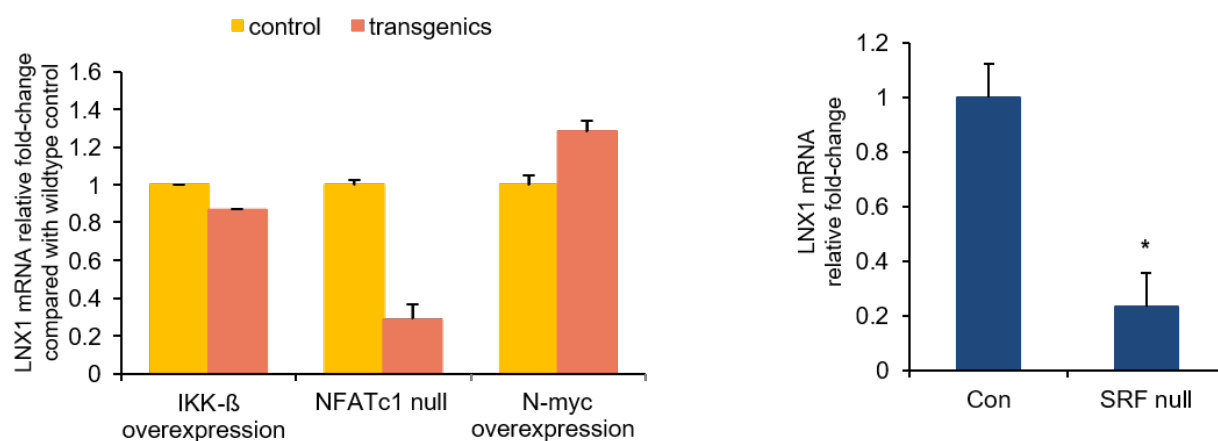

**Figure S2.** Several oncogenic transcription factors are involved with the expression of *LNK1*. (A) Potential transcription factor binding sites within the *LNK1* gene promoter were screened using the AliBaba 2.1 program ([www.gene-regulation.com](http://www.gene-regulation.com)). The program searches putative transcription binding sites against the TRANSFAC database. (B) Serum response factor, *NFATc1*, *IKK- $\beta$*  and *N-myc* contribute to the expression of *LNK1*. Expression profiles from the GSE13333, GSE17511, GSE37219, and GSE6077 datasets were obtained from the Gene Expression Omnibus. The expression of *LNK1* was analyzed, and the relative expression levels are shown in the graph. Wild type-mice vs. SRF deficient mice, \*:  $p < 0.05$ .

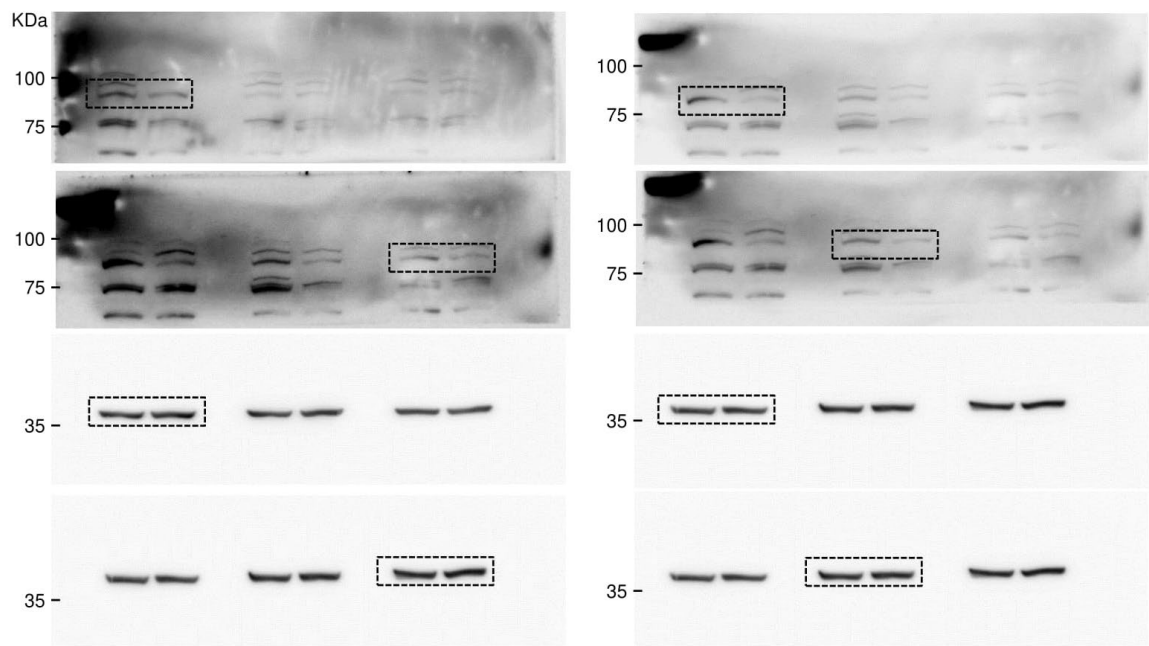

Figure 1C

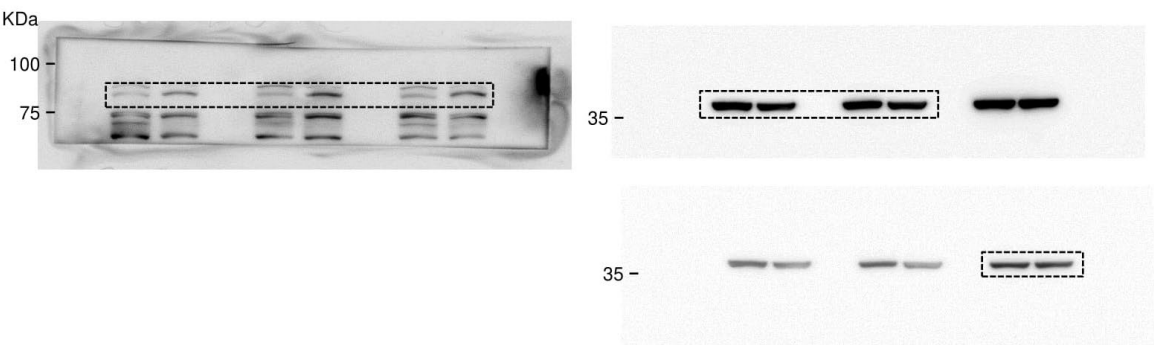

Figure 2C

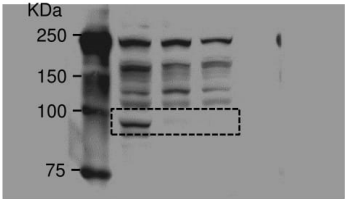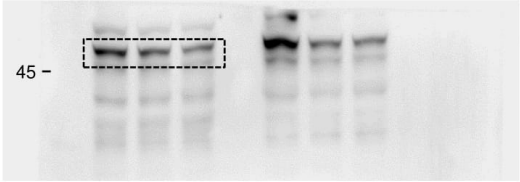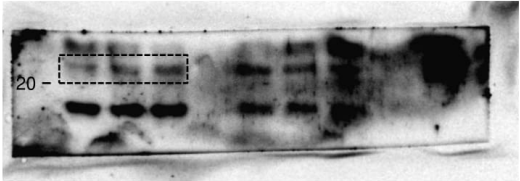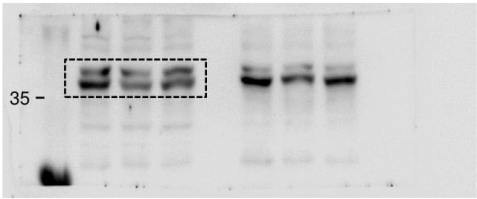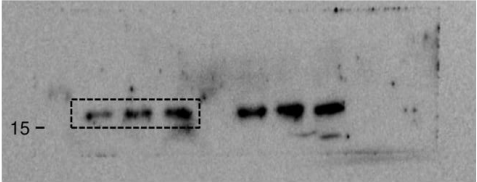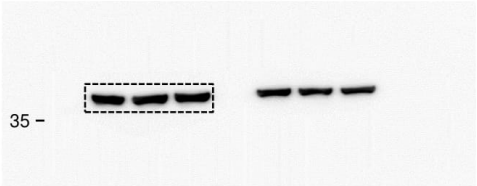

Figure 4A

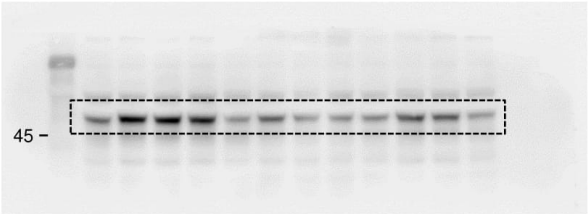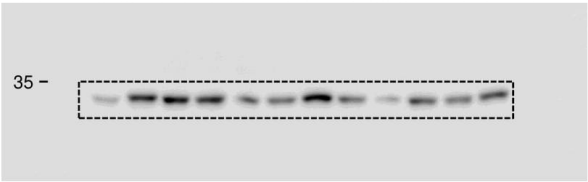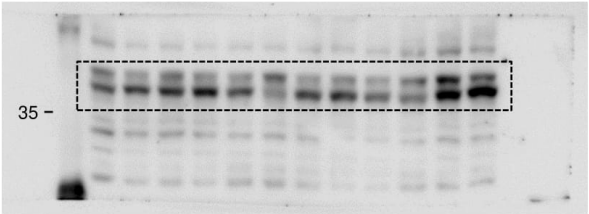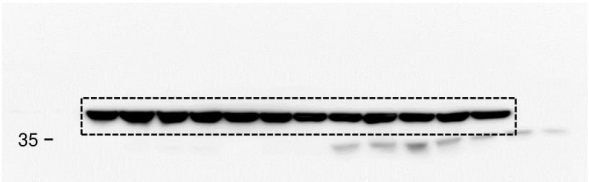

Figure 4C

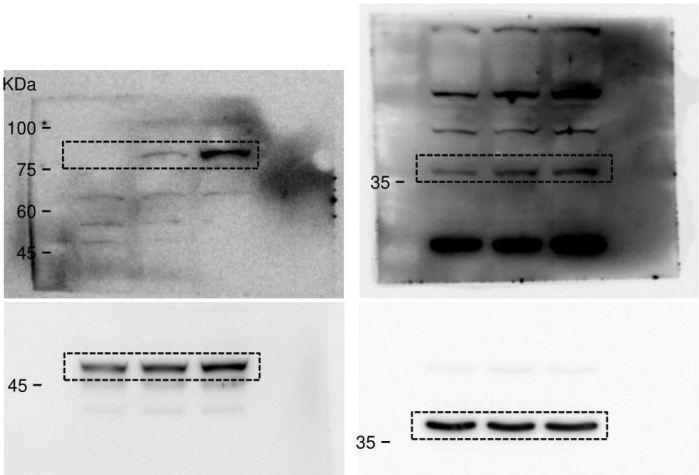

Figure 5A

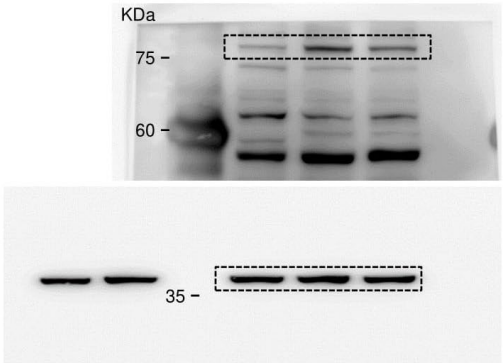

Figure 5D

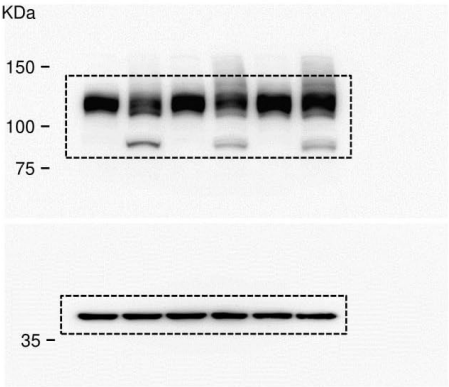

Figure 6E

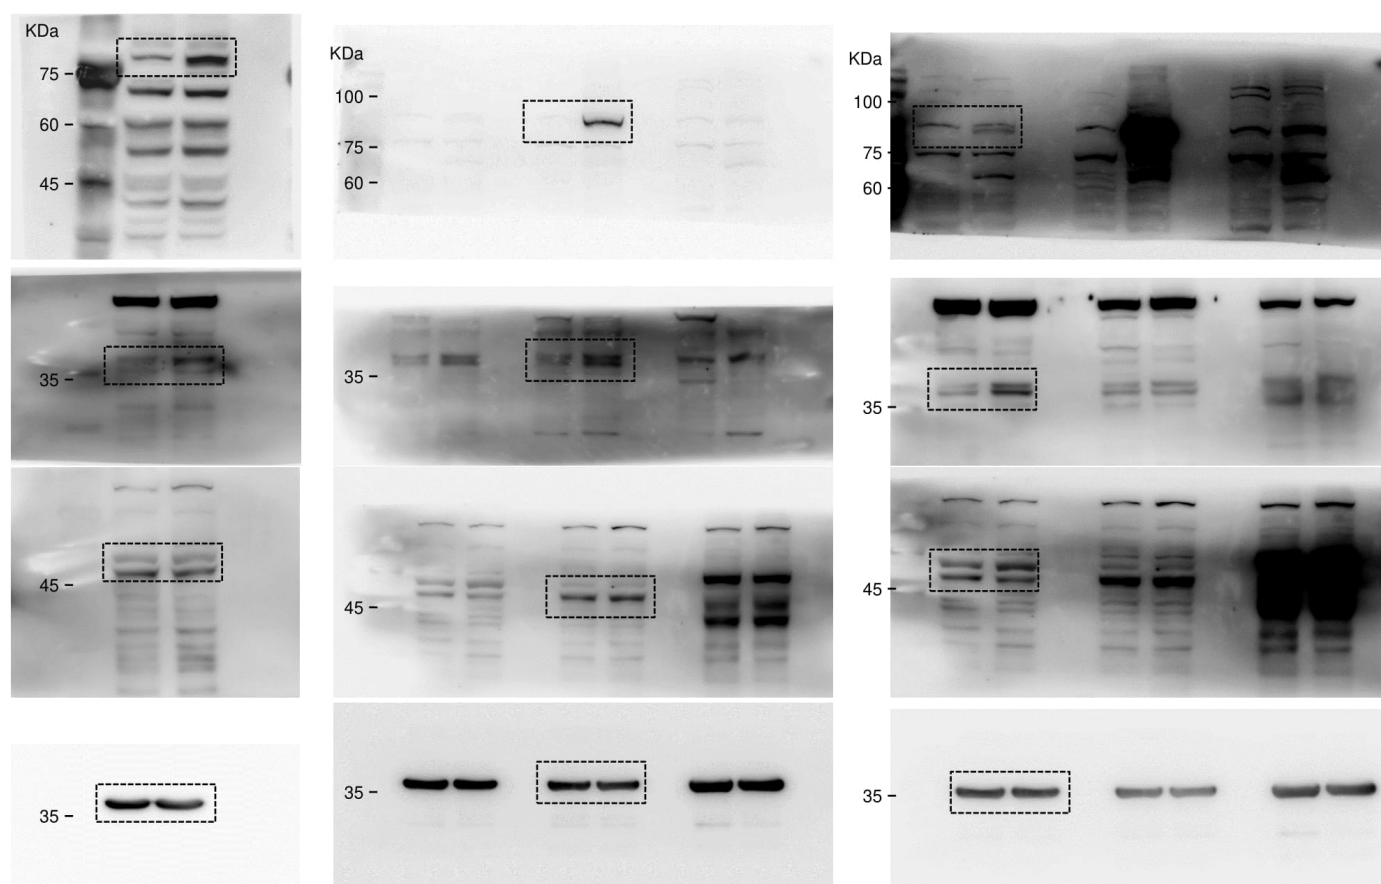

Figure 7

**Figure S3.** Full length blots cropped for representative figures.
